# Supplementary material for: Neutral homoleptic tetranuclear iron carbonyls: why haven’t they been synthesized as stable molecules?
Source: Royal Society of Chemistry journal article supplement (doi:10.1039/b9nj00284g), 2009-12-11
Supplement: b9nj00284g.pdf [file b9nj00284g.pdf]

# Neutral Homoleptic Tetranuclear Iron Carbonyls: Why Haven't They Been Synthesized as Stable Molecules?

Ting Ting Shi,<sup>a</sup> Qian-Shu Li,<sup>\*a,b</sup> Yaoming Xie,<sup>c</sup> R. Bruce King,<sup>\*a,c</sup>  
and Henry F. Schaefer III<sup>c</sup>

<sup>a</sup>*Center for Computational Quantum Chemistry, South China Normal University,  
Guangzhou, 510631 China*

<sup>b</sup>*Institute of Chemical Physics, Beijing Institute of Technology, Beijing 100081, China*

<sup>c</sup>*Department of Chemistry and Center for Computational Chemistry  
University of Georgia, Athens, Georgia 30602, USA*

## Supporting Information

**Tables S1 to S9:** Cartesian coordinates for the nine optimized  $\text{Fe}_4(\text{CO})_n$  ( $n = 16, 15, 14$  structures),

**Tables S10 to S18:** Harmonic vibrational frequencies for the nine optimized  $\text{Fe}_4(\text{CO})_n$  ( $n = 16, 15, 14$  structures),

Complete Gaussian reference (reference 27).

**Table S1.** Cartesian coordinates for the optimized Fe<sub>4</sub>(CO)<sub>16</sub> structure **16-1**.

| 16-1 | B3LYP     |           |           | BP86      |           |           |
|------|-----------|-----------|-----------|-----------|-----------|-----------|
|      | X         | Y         | Z         | X         | Y         | Z         |
| Fe   | 0.000000  | 2.070247  | 0.000000  | 0.000000  | 2.027989  | 0.000000  |
| Fe   | -2.070247 | 0.000000  | 0.000000  | -2.027989 | 0.000000  | 0.000000  |
| Fe   | 2.070247  | 0.000000  | 0.000000  | 2.027989  | 0.000000  | 0.000000  |
| Fe   | 0.000000  | -2.070247 | 0.000000  | 0.000000  | -2.027989 | 0.000000  |
| C    | 1.906720  | 0.583753  | 1.721529  | 1.864548  | 0.658343  | 1.690312  |
| C    | 1.906720  | -0.583753 | -1.721529 | 1.864548  | -0.658343 | -1.690312 |
| C    | -1.906720 | -0.583753 | 1.721529  | -1.864548 | -0.658343 | 1.690312  |
| C    | -1.906720 | 0.583753  | -1.721529 | -1.864548 | 0.658343  | -1.690312 |
| C    | 0.583753  | 1.906720  | -1.721529 | 0.658343  | 1.864548  | -1.690312 |
| C    | -0.583753 | 1.906720  | 1.721529  | -0.658343 | 1.864548  | 1.690312  |
| C    | -0.583753 | -1.906720 | -1.721529 | -0.658343 | -1.864548 | -1.690312 |
| C    | 0.583753  | -1.906720 | 1.721529  | 0.658343  | -1.864548 | 1.690312  |
| C    | -1.241106 | 3.284065  | -0.454163 | -1.188885 | 3.258415  | -0.500449 |
| C    | 1.241106  | 3.284065  | 0.454163  | 1.188885  | 3.258415  | 0.500449  |
| C    | -1.241106 | -3.284065 | 0.454163  | -1.188885 | -3.258415 | 0.500449  |
| C    | 1.241106  | -3.284065 | -0.454163 | 1.188885  | -3.258415 | -0.500449 |
| C    | -3.284065 | -1.241106 | -0.454163 | -3.258415 | -1.188885 | -0.500449 |
| C    | -3.284065 | 1.241106  | 0.454163  | -3.258415 | 1.188885  | 0.500449  |
| C    | 3.284065  | -1.241106 | 0.454163  | 3.258415  | -1.188885 | 0.500449  |
| C    | 3.284065  | 1.241106  | -0.454163 | 3.258415  | 1.188885  | -0.500449 |
| O    | 4.110779  | -1.986776 | 0.757622  | 4.118734  | -1.907593 | 0.831276  |
| O    | 1.986776  | -4.110779 | -0.757622 | 1.907593  | -4.118734 | -0.831276 |
| O    | -1.986776 | -4.110779 | 0.757622  | -1.907593 | -4.118734 | 0.831276  |
| O    | -4.110779 | -1.986776 | -0.757622 | -4.118734 | -1.907593 | -0.831276 |
| O    | 4.110779  | 1.986776  | -0.757622 | 4.118734  | 1.907593  | -0.831276 |
| O    | 1.986776  | 4.110779  | 0.757622  | 1.907593  | 4.118734  | 0.831276  |
| O    | -4.110779 | 1.986776  | 0.757622  | -4.118734 | 1.907593  | 0.831276  |
| O    | -1.986776 | 4.110779  | -0.757622 | -1.907593 | 4.118734  | -0.831276 |
| O    | 2.004163  | 0.899232  | 2.830611  | 1.994206  | 1.007761  | 2.800989  |
| O    | 2.004163  | -0.899232 | -2.830611 | 1.994206  | -1.007761 | -2.800989 |
| O    | 0.899232  | -2.004163 | 2.830611  | 1.007761  | -1.994206 | 2.800989  |
| O    | -0.899232 | -2.004163 | -2.830611 | -1.007761 | -1.994206 | -2.800989 |
| O    | -2.004163 | -0.899232 | 2.830611  | -1.994206 | -1.007761 | 2.800989  |
| O    | -2.004163 | 0.899232  | -2.830611 | -1.994206 | 1.007761  | -2.800989 |
| O    | -0.899232 | 2.004163  | 2.830611  | -1.007761 | 1.994206  | 2.800989  |
| O    | 0.899232  | 2.004163  | -2.830611 | 1.007761  | 1.994206  | -2.800989 |

**Table S2.** Cartesian coordinates for the optimized Fe<sub>4</sub>(CO)<sub>16</sub> structure **16-2**.

| 16-2 | B3LYP     |           |           | BP86      |           |           |
|------|-----------|-----------|-----------|-----------|-----------|-----------|
|      | X         | Y         | Z         | X         | Y         | Z         |
| Fe   | 0.000000  | 2.076739  | 0.222036  | 0.000000  | 2.042588  | 0.216052  |
| Fe   | -2.076739 | 0.000000  | -0.222036 | -2.042588 | 0.000000  | -0.216052 |
| Fe   | 2.076739  | 0.000000  | -0.222036 | 2.042588  | 0.000000  | -0.216052 |
| Fe   | 0.000000  | -2.076739 | 0.222036  | 0.000000  | -2.042588 | 0.216052  |
| C    | 2.335606  | 0.000000  | 1.581859  | 2.318140  | 0.000000  | 1.577802  |
| C    | 1.585332  | 0.000000  | -1.977449 | 1.569763  | 0.000000  | -1.967651 |
| C    | -2.335606 | 0.000000  | 1.581859  | -2.318140 | 0.000000  | 1.577802  |
| C    | -1.585332 | 0.000000  | -1.977449 | -1.569763 | 0.000000  | -1.967651 |
| C    | 0.000000  | 2.335606  | -1.581859 | 0.000000  | 2.318140  | -1.577802 |
| C    | 0.000000  | 1.585332  | 1.977449  | 0.000000  | 1.569763  | 1.967651  |
| C    | 0.000000  | -2.335606 | -1.581859 | 0.000000  | -2.318140 | -1.577802 |
| C    | 0.000000  | -1.585332 | 1.977449  | 0.000000  | -1.569763 | 1.967651  |
| C    | -1.322984 | 3.252810  | 0.496710  | -1.298704 | 3.227386  | 0.493310  |
| C    | 1.322984  | 3.252810  | 0.496710  | 1.298704  | 3.227386  | 0.493310  |
| C    | -1.322984 | -3.252810 | 0.496710  | -1.298704 | -3.227386 | 0.493310  |
| C    | 1.322984  | -3.252810 | 0.496710  | 1.298704  | -3.227386 | 0.493310  |
| C    | -3.252810 | -1.322984 | -0.496710 | -3.227386 | -1.298704 | -0.493310 |
| C    | -3.252810 | 1.322984  | -0.496710 | -3.227386 | 1.298704  | -0.493310 |
| C    | 3.252810  | -1.322984 | -0.496710 | 3.227386  | -1.298704 | -0.493310 |
| C    | 3.252810  | 1.322984  | -0.496710 | 3.227386  | 1.298704  | -0.493310 |
| O    | 4.077658  | -2.104591 | -0.701645 | 4.078024  | -2.072681 | -0.706236 |
| O    | 2.104591  | -4.077658 | 0.701645  | 2.072681  | -4.078024 | 0.706236  |
| O    | -2.104591 | -4.077658 | 0.701645  | -2.072681 | -4.078024 | 0.706236  |
| O    | -4.077658 | -2.104591 | -0.701645 | -4.078024 | -2.072681 | -0.706236 |
| O    | 4.077658  | 2.104591  | -0.701645 | 4.078024  | 2.072681  | -0.706236 |
| O    | 2.104591  | 4.077658  | 0.701645  | 2.072681  | 4.078024  | 0.706236  |
| O    | -4.077658 | 2.104591  | -0.701645 | -4.078024 | 2.072681  | -0.706236 |
| O    | -2.104591 | 4.077658  | 0.701645  | -2.072681 | 4.078024  | 0.706236  |
| O    | 2.656495  | 0.000000  | 2.691886  | 2.676127  | 0.000000  | 2.691049  |
| O    | 1.467920  | 0.000000  | -3.126273 | 1.482626  | 0.000000  | -3.133564 |
| O    | 0.000000  | -1.467920 | 3.126273  | 0.000000  | -1.482626 | 3.133564  |
| O    | 0.000000  | -2.656495 | -2.691886 | 0.000000  | -2.676127 | -2.691049 |
| O    | -2.656495 | 0.000000  | 2.691886  | -2.676127 | 0.000000  | 2.691049  |
| O    | -1.467920 | 0.000000  | -3.126273 | -1.482626 | 0.000000  | -3.133564 |
| O    | 0.000000  | 1.467920  | 3.126273  | 0.000000  | 1.482626  | 3.133564  |
| O    | 0.000000  | 2.656495  | -2.691886 | 0.000000  | 2.676127  | -2.691049 |

**Table S3.** Cartesian coordinates for the optimized Fe<sub>4</sub>(CO)<sub>16</sub> structure **16-3**.

| 16-3 | B3LYP     |           |           | BP86      |           |           |
|------|-----------|-----------|-----------|-----------|-----------|-----------|
|      | X         | Y         | Z         | X         | Y         | Z         |
| Fe   | 0.188152  | 1.464582  | 0.000000  | 0.225575  | 1.415617  | 0.000000  |
| Fe   | -2.649131 | 0.135906  | 0.000000  | -2.623389 | 0.202605  | 0.000000  |
| Fe   | 2.649131  | -0.135906 | 0.000000  | 2.623389  | -0.202605 | 0.000000  |
| Fe   | -0.188152 | -1.464582 | 0.000000  | -0.225575 | -1.415617 | 0.000000  |
| C    | 2.609826  | -0.067099 | 1.828223  | 2.614122  | -0.109845 | 1.815238  |
| C    | 2.609826  | -0.067099 | -1.828223 | 2.614122  | -0.109845 | -1.815238 |
| C    | -2.609826 | 0.067099  | 1.828223  | -2.614122 | 0.109845  | 1.815238  |
| C    | -2.609826 | 0.067099  | -1.828223 | -2.614122 | 0.109845  | -1.815238 |
| C    | 0.044542  | 1.471091  | -1.821418 | 0.050922  | 1.440415  | -1.806153 |
| C    | 0.044542  | 1.471091  | 1.821418  | 0.050922  | 1.440415  | 1.806153  |
| C    | -0.044542 | -1.471091 | -1.821418 | -0.050922 | -1.440415 | -1.806153 |
| C    | -0.044542 | -1.471091 | 1.821418  | -0.050922 | -1.440415 | 1.806153  |
| C    | -0.268401 | 3.178411  | 0.000000  | -0.179205 | 3.128373  | 0.000000  |
| C    | 2.005197  | 1.893508  | 0.000000  | 2.043779  | 1.842576  | 0.000000  |
| C    | -2.005197 | -1.893508 | 0.000000  | -2.043779 | -1.842576 | 0.000000  |
| C    | 0.268401  | -3.178411 | 0.000000  | 0.179205  | -3.128373 | 0.000000  |
| C    | -4.350781 | -0.427701 | 0.000000  | -4.336173 | -0.273419 | 0.000000  |
| C    | -2.954139 | 1.932615  | 0.000000  | -2.879882 | 1.999708  | 0.000000  |
| C    | 2.954139  | -1.932615 | 0.000000  | 2.879882  | -1.999708 | 0.000000  |
| C    | 4.350781  | 0.427701  | 0.000000  | 4.336173  | 0.273419  | 0.000000  |
| O    | 3.330073  | -3.024668 | 0.000000  | 3.244258  | -3.110385 | 0.000000  |
| O    | 0.493853  | -4.310850 | 0.000000  | 0.371478  | -4.282789 | 0.000000  |
| O    | -2.700109 | -2.852772 | 0.000000  | -2.767977 | -2.791997 | 0.000000  |
| O    | -5.452890 | -0.761268 | 0.000000  | -5.469293 | -0.551998 | 0.000000  |
| O    | 5.452890  | 0.761268  | 0.000000  | 5.469293  | 0.551998  | 0.000000  |
| O    | 2.700109  | 2.852772  | 0.000000  | 2.767977  | 2.791997  | 0.000000  |
| O    | -3.330073 | 3.024668  | 0.000000  | -3.244258 | 3.110385  | 0.000000  |
| O    | -0.493853 | 4.310850  | 0.000000  | -0.371478 | 4.282789  | 0.000000  |
| O    | 2.690671  | -0.023464 | 2.976435  | 2.734292  | -0.055164 | 2.973981  |
| O    | 2.690671  | -0.023464 | -2.976435 | 2.734292  | -0.055164 | -2.973981 |
| O    | 0.044542  | -1.601654 | 2.964796  | 0.050922  | -1.611898 | 2.958489  |
| O    | 0.044542  | -1.601654 | -2.964796 | 0.050922  | -1.611898 | -2.958489 |
| O    | -2.690671 | 0.023464  | 2.976435  | -2.734292 | 0.055164  | 2.973981  |
| O    | -2.690671 | 0.023464  | -2.976435 | -2.734292 | 0.055164  | -2.973981 |
| O    | -0.044542 | 1.601654  | 2.964796  | -0.050922 | 1.611898  | 2.958489  |
| O    | -0.044542 | 1.601654  | -2.964796 | -0.050922 | 1.611898  | -2.958489 |

**Table S4.** Cartesian coordinates for the optimized Fe<sub>4</sub>(CO)<sub>16</sub> structure **16-4**

| 16-4 | B3LYP     |           |           | BP86      |           |           |
|------|-----------|-----------|-----------|-----------|-----------|-----------|
|      | X         | Y         | Z         | X         | Y         | Z         |
| Fe   | 0.000000  | 2.112619  | 0.000000  | 0.000000  | 2.075617  | 0.000000  |
| Fe   | -2.112619 | 0.000000  | 0.000000  | -2.075617 | 0.000000  | 0.000000  |
| Fe   | 2.112619  | 0.000000  | 0.000000  | 2.075617  | 0.000000  | 0.000000  |
| Fe   | 0.000000  | -2.112619 | 0.000000  | 0.000000  | -2.075617 | 0.000000  |
| C    | 1.988842  | 0.000000  | 1.818722  | 1.971681  | 0.000000  | 1.812211  |
| C    | 1.988842  | 0.000000  | -1.818722 | 1.971681  | 0.000000  | -1.812211 |
| C    | -1.988842 | 0.000000  | 1.818722  | -1.971681 | 0.000000  | 1.812211  |
| C    | -1.988842 | 0.000000  | -1.818722 | -1.971681 | 0.000000  | -1.812211 |
| C    | 0.000000  | 1.988842  | -1.818722 | 0.000000  | 1.971681  | -1.812211 |
| C    | 0.000000  | 1.988842  | 1.818722  | 0.000000  | 1.971681  | 1.812211  |
| C    | 0.000000  | -1.988842 | -1.818722 | 0.000000  | -1.971681 | -1.812211 |
| C    | 0.000000  | -1.988842 | 1.818722  | 0.000000  | -1.971681 | 1.812211  |
| C    | -1.303883 | 3.339482  | 0.000000  | -1.279349 | 3.311214  | 0.000000  |
| C    | 1.303883  | 3.339482  | 0.000000  | 1.279349  | 3.311214  | 0.000000  |
| C    | -1.303883 | -3.339482 | 0.000000  | -1.279349 | -3.311214 | 0.000000  |
| C    | 1.303883  | -3.339482 | 0.000000  | 1.279349  | -3.311214 | 0.000000  |
| C    | -3.339482 | -1.303883 | 0.000000  | -3.311214 | -1.279349 | 0.000000  |
| C    | -3.339482 | 1.303883  | 0.000000  | -3.311214 | 1.279349  | 0.000000  |
| C    | 3.339482  | -1.303883 | 0.000000  | 3.311214  | -1.279349 | 0.000000  |
| C    | 3.339482  | 1.303883  | 0.000000  | 3.311214  | 1.279349  | 0.000000  |
| O    | 4.211778  | -2.060301 | 0.000000  | 4.210897  | -2.026644 | 0.000000  |
| O    | 2.060301  | -4.211778 | 0.000000  | 2.026644  | -4.210897 | 0.000000  |
| O    | -2.060301 | -4.211778 | 0.000000  | -2.026644 | -4.210897 | 0.000000  |
| O    | -4.211778 | -2.060301 | 0.000000  | -4.210897 | -2.026644 | 0.000000  |
| O    | 4.211778  | 2.060301  | 0.000000  | 4.210897  | 2.026644  | 0.000000  |
| O    | 2.060301  | 4.211778  | 0.000000  | 2.026644  | 4.210897  | 0.000000  |
| O    | -4.211778 | 2.060301  | 0.000000  | -4.210897 | 2.026644  | 0.000000  |
| O    | -2.060301 | 4.211778  | 0.000000  | -2.026644 | 4.210897  | 0.000000  |
| O    | 2.097610  | 0.000000  | 2.968849  | 2.117527  | 0.000000  | 2.972475  |
| O    | 2.097610  | 0.000000  | -2.968849 | 2.117527  | 0.000000  | -2.972475 |
| O    | 0.000000  | -2.097610 | 2.968849  | 0.000000  | -2.117527 | 2.972475  |
| O    | 0.000000  | -2.097610 | -2.968849 | 0.000000  | -2.117527 | -2.972475 |
| O    | -2.097610 | 0.000000  | 2.968849  | -2.117527 | 0.000000  | 2.972475  |
| O    | -2.097610 | 0.000000  | -2.968849 | -2.117527 | 0.000000  | -2.972475 |
| O    | 0.000000  | 2.097610  | 2.968849  | 0.000000  | 2.117527  | 2.972475  |
| O    | 0.000000  | 2.097610  | -2.968849 | 0.000000  | 2.117527  | -2.972475 |

**Table S5.** Cartesian coordinates for the optimized Fe<sub>4</sub>(CO)<sub>15</sub> structure **15-1**

| 15-1 | B3LYP     |           |           | BP86      |           |           |
|------|-----------|-----------|-----------|-----------|-----------|-----------|
|      | X         | Y         | Z         | X         | Y         | Z         |
| Fe   | -1.329271 | 0.039418  | 0.000000  | -1.342218 | 0.017306  | 0.000000  |
| Fe   | -0.088809 | -2.376918 | 0.000000  | -0.007288 | -2.370168 | 0.000000  |
| Fe   | -0.053167 | 2.424401  | 0.000000  | -0.002789 | 2.349128  | 0.000000  |
| Fe   | 1.532151  | -0.002827 | 0.000000  | 1.404071  | 0.031345  | 0.000000  |
| C    | 0.102313  | 2.569280  | 1.820746  | 0.049086  | 2.558943  | 1.805667  |
| C    | 0.102313  | 2.569280  | -1.820746 | 0.049086  | 2.558943  | -1.805667 |
| C    | -0.088684 | -2.349853 | 1.822689  | -0.032707 | -2.344835 | 1.814305  |
| C    | -0.088684 | -2.349853 | -1.822689 | -0.032707 | -2.344835 | -1.814305 |
| C    | -1.403206 | 0.061582  | -1.821789 | -1.429858 | 0.013835  | -1.808869 |
| C    | -1.403206 | 0.061582  | 1.821789  | -1.429858 | 0.013835  | 1.808869  |
| C    | 1.474066  | -0.036124 | -1.819129 | 1.411898  | -0.027992 | -1.811888 |
| C    | 1.474066  | -0.036124 | 1.819129  | 1.411898  | -0.027992 | 1.811888  |
| C    | -3.031488 | -0.475349 | 0.000000  | -2.996737 | -0.601486 | 0.000000  |
| C    | 2.908580  | -1.145302 | 0.000000  | 2.974299  | -0.802447 | 0.000000  |
| C    | 2.458358  | 1.540106  | 0.000000  | 2.113666  | 1.746718  | 0.000000  |
| C    | 1.122434  | -3.715199 | 0.000000  | 1.296688  | -3.593704 | 0.000000  |
| C    | -1.624991 | -3.294533 | 0.000000  | -1.414684 | -3.458643 | 0.000000  |
| C    | 0.075291  | 4.190175  | 0.000000  | 0.016933  | 4.108598  | 0.000000  |
| C    | -1.866337 | 2.132185  | 0.000000  | -1.898269 | 1.938744  | 0.000000  |
| O    | 0.129888  | 5.346315  | 0.000000  | 0.018759  | 5.280921  | 0.000000  |
| O    | 3.254921  | 2.383668  | 0.000000  | 3.016164  | 2.510537  | 0.000000  |
| O    | 3.842800  | -1.825512 | 0.000000  | 4.027495  | -1.310366 | 0.000000  |
| O    | 1.865239  | -4.596814 | 0.000000  | 2.127227  | -4.414998 | 0.000000  |
| O    | -2.937636 | 2.614520  | 0.000000  | -2.920587 | 2.545004  | 0.000000  |
| O    | -2.600596 | -3.911427 | 0.000000  | -2.325717 | -4.189951 | 0.000000  |
| O    | -4.139523 | -0.799922 | 0.000000  | -4.101701 | -0.987500 | 0.000000  |
| O    | 0.208766  | 2.789386  | 2.946720  | 0.080993  | 2.841746  | 2.937793  |
| O    | 0.208766  | 2.789386  | -2.946720 | 0.080993  | 2.841746  | -2.937793 |
| O    | 1.604197  | -0.024491 | 2.966778  | 1.597975  | -0.011923 | 2.966007  |
| O    | 1.604197  | -0.024491 | -2.966778 | 1.597975  | -0.011923 | -2.966007 |
| O    | -0.097711 | -2.523745 | 2.963791  | -0.059282 | -2.554589 | 2.963679  |
| O    | -0.097711 | -2.523745 | -2.963791 | -0.059282 | -2.554589 | -2.963679 |
| O    | -1.600828 | 0.121120  | 2.958200  | -1.657918 | 0.061444  | 2.955469  |
| O    | -1.600828 | 0.121120  | -2.958200 | -1.657918 | 0.061444  | -2.955469 |

**Table S6.** Cartesian coordinates for the optimized Fe<sub>4</sub>(CO)<sub>15</sub> structure **15-2**

| 15-2 | B3LYP     |           |           | BP86      |           |           |
|------|-----------|-----------|-----------|-----------|-----------|-----------|
|      | X         | Y         | Z         | X         | Y         | Z         |
| Fe   | 0.000000  | 0.000000  | -1.296971 | 0.000000  | 0.000000  | -1.423809 |
| Fe   | 0.000000  | 2.397892  | -0.123317 | 0.000000  | 2.322325  | 0.093927  |
| Fe   | 0.000000  | -2.397892 | -0.123317 | 0.000000  | -2.322325 | 0.093927  |
| Fe   | 0.000000  | 0.000000  | 1.562292  | 0.000000  | 0.000000  | 1.463182  |
| C    | 1.823274  | -2.429913 | -0.028902 | 1.806053  | -2.490804 | 0.196200  |
| C    | -1.823274 | -2.429913 | -0.028902 | -1.806053 | -2.490804 | 0.196200  |
| C    | 1.823274  | 2.429913  | -0.028902 | 1.806053  | 2.490804  | 0.196200  |
| C    | -1.823274 | 2.429913  | -0.028902 | -1.806053 | 2.490804  | 0.196200  |
| C    | -1.818022 | 0.000000  | -1.389948 | -1.814968 | 0.000000  | -1.436664 |
| C    | 1.818022  | 0.000000  | -1.389948 | 1.814968  | 0.000000  | -1.436664 |
| C    | -1.818308 | 0.000000  | 1.499497  | -1.812671 | 0.000000  | 1.448841  |
| C    | 1.818308  | 0.000000  | 1.499497  | 1.812671  | 0.000000  | 1.448841  |
| C    | 0.000000  | 0.000000  | -3.073457 | 0.000000  | 0.000000  | -3.192331 |
| C    | 0.000000  | 1.373394  | 2.710202  | 0.000000  | 1.382194  | 2.600791  |
| C    | 0.000000  | -1.373394 | 2.710202  | 0.000000  | -1.382194 | 2.600791  |
| C    | 0.000000  | 3.958849  | 0.769563  | 0.000000  | 4.063878  | 0.369793  |
| C    | 0.000000  | 2.835678  | -1.850145 | 0.000000  | 2.217147  | -1.731824 |
| C    | 0.000000  | -3.958849 | 0.769563  | 0.000000  | -4.063878 | 0.369793  |
| C    | 0.000000  | -2.835678 | -1.850145 | 0.000000  | -2.217147 | -1.731824 |
| O    | 0.000000  | -4.990796 | 1.286568  | 0.000000  | -5.223850 | 0.534336  |
| O    | 0.000000  | -2.169639 | 3.550223  | 0.000000  | -2.150827 | 3.487292  |
| O    | 0.000000  | 2.169639  | 3.550223  | 0.000000  | 2.150827  | 3.487292  |
| O    | 0.000000  | 4.990796  | 1.286568  | 0.000000  | 5.223850  | 0.534336  |
| O    | 0.000000  | -3.248669 | -2.933137 | 0.000000  | -2.803002 | -2.763981 |
| O    | 0.000000  | 3.248669  | -2.933137 | 0.000000  | 2.803002  | -2.763981 |
| O    | 0.000000  | 0.000000  | -4.228297 | 0.000000  | 0.000000  | -4.358714 |
| O    | 2.961023  | -2.609982 | 0.028338  | 2.941029  | -2.762411 | 0.236254  |
| O    | -2.961023 | -2.609982 | 0.028338  | -2.941029 | -2.762411 | 0.236254  |
| O    | 2.966471  | 0.000000  | 1.627714  | 2.968496  | 0.000000  | 1.622570  |
| O    | -2.966471 | 0.000000  | 1.627714  | -2.968496 | 0.000000  | 1.622570  |
| O    | 2.961023  | 2.609982  | 0.028338  | 2.941029  | 2.762411  | 0.236254  |
| O    | -2.961023 | 2.609982  | 0.028338  | -2.941029 | 2.762411  | 0.236254  |
| O    | 2.952187  | 0.000000  | -1.612735 | 2.974865  | 0.000000  | -1.577991 |
| O    | -2.952187 | 0.000000  | -1.612735 | -2.974865 | 0.000000  | -1.577991 |

**Table S7.** Cartesian coordinates for the optimized Fe<sub>4</sub>(CO)<sub>14</sub> structure **14-1**

| 14-1 | B3LYP     |           |           | BP86      |           |           |
|------|-----------|-----------|-----------|-----------|-----------|-----------|
|      | X         | Y         | Z         | X         | Y         | Z         |
| Fe   | 1.332237  | 0.000000  | 0.910378  | 1.305208  | 0.000000  | 0.921109  |
| Fe   | -1.332237 | 0.000000  | 0.910378  | -1.305208 | 0.000000  | 0.921109  |
| Fe   | 0.000000  | 1.332237  | -0.910378 | 0.000000  | 1.305208  | -0.921109 |
| Fe   | 0.000000  | -1.332237 | -0.910378 | 0.000000  | -1.305208 | -0.921109 |
| C    | -1.299517 | 2.241616  | -1.762933 | -1.270531 | 2.247323  | -1.751682 |
| C    | 0.000000  | 2.414565  | 0.509574  | 0.000000  | 2.347766  | 0.532005  |
| C    | 1.299517  | 2.241616  | -1.762933 | 1.270531  | 2.247323  | -1.751682 |
| C    | 0.000000  | -2.414565 | 0.509574  | 0.000000  | -2.347766 | 0.532005  |
| C    | 1.299517  | -2.241616 | -1.762933 | 1.270531  | -2.247323 | -1.751682 |
| C    | -1.299517 | -2.241616 | -1.762933 | -1.270531 | -2.247323 | -1.751682 |
| C    | 0.000000  | 0.000000  | -2.431830 | 0.000000  | 0.000000  | -2.452885 |
| C    | 2.241616  | -1.299517 | 1.762933  | 2.247323  | -1.270531 | 1.751682  |
| C    | 2.241616  | 1.299517  | 1.762933  | 2.247323  | 1.270531  | 1.751682  |
| C    | 2.414565  | 0.000000  | -0.509574 | 2.347766  | 0.000000  | -0.532005 |
| C    | -2.241616 | 1.299517  | 1.762933  | -2.247323 | 1.270531  | 1.751682  |
| C    | -2.241616 | -1.299517 | 1.762933  | -2.247323 | -1.270531 | 1.751682  |
| C    | -2.414565 | 0.000000  | -0.509574 | -2.347766 | 0.000000  | -0.532005 |
| O    | 0.000000  | 0.000000  | 2.431830  | 0.000000  | 0.000000  | 2.452885  |
| O    | -2.890976 | -2.088599 | 2.296819  | -2.936140 | -2.049320 | 2.284347  |
| O    | -2.890976 | 2.088599  | 2.296819  | -2.936140 | 2.049320  | 2.284347  |
| O    | -3.282075 | 0.000000  | -1.283795 | -3.234559 | 0.000000  | -1.305277 |
| O    | 0.000000  | 0.000000  | 3.599019  | 0.000000  | 0.000000  | 3.634533  |
| O    | 2.890976  | -2.088599 | 2.296819  | 2.936140  | -2.049320 | 2.284347  |
| O    | 2.890976  | 2.088599  | 2.296819  | 2.936140  | 2.049320  | 2.284347  |
| O    | 3.282075  | 0.000000  | -1.283795 | 3.234559  | 0.000000  | -1.305277 |
| O    | -2.088599 | -2.890976 | -2.296819 | -2.049320 | -2.936140 | -2.284347 |
| O    | 2.088599  | -2.890976 | -2.296819 | 2.049320  | -2.936140 | -2.284347 |
| O    | 0.000000  | -3.282075 | 1.283795  | 0.000000  | -3.234559 | 1.305277  |
| O    | 0.000000  | 0.000000  | -3.599019 | 0.000000  | 0.000000  | -3.634533 |
| O    | -2.088599 | 2.890976  | -2.296819 | -2.049320 | 2.936140  | -2.284347 |
| C    | 2.088599  | 2.890976  | -2.296819 | 2.049320  | 2.936140  | -2.284347 |
| O    | 0.000000  | 3.282075  | 1.283795  | 0.000000  | 3.234559  | 1.305277  |



**Table S8.** Cartesian coordinates for the optimized Fe<sub>4</sub>(CO)<sub>14</sub> structure **14-2**

| 14-2 | B3LYP     |           |           | BP86      |           |           |
|------|-----------|-----------|-----------|-----------|-----------|-----------|
|      | X         | Y         | Z         | X         | Y         | Z         |
| Fe   | 1.595489  | -0.129768 | 0.000000  | 0.086332  | 1.552510  | 0.000121  |
| Fe   | -0.170232 | 2.353391  | 0.000000  | -2.336143 | -0.168011 | -0.000115 |
| Fe   | -0.470657 | -2.190096 | 0.000000  | 2.186381  | -0.431007 | 0.000063  |
| Fe   | -1.169940 | 0.211958  | 0.000000  | -0.188309 | -1.153550 | -0.000085 |
| C    | -1.322467 | -0.999403 | 1.398864  | 1.008490  | -1.335339 | 1.397860  |
| C    | -0.424349 | 2.034377  | 1.770455  | -2.015202 | -0.460831 | 1.759556  |
| C    | -0.424349 | 2.034377  | -1.770455 | -2.015040 | -0.460538 | -1.759806 |
| C    | 1.460090  | -0.152274 | -1.817765 | 0.121306  | 1.417477  | -1.808757 |
| C    | 1.460090  | -0.152274 | 1.817765  | 0.121159  | 1.417178  | 1.808980  |
| C    | -1.322467 | -0.999403 | -1.398864 | 1.008607  | -1.335125 | -1.397959 |
| C    | 2.868549  | 1.137417  | 0.000000  | -1.141370 | 2.855053  | 0.000176  |
| C    | 2.693373  | -1.545052 | 0.000000  | 1.482553  | 2.662289  | 0.000266  |
| C    | -2.885019 | 0.638076  | 0.000000  | -0.642531 | -2.844913 | -0.000233 |
| C    | -1.463344 | 3.582237  | 0.000000  | -3.599295 | -1.404107 | -0.000280 |
| C    | 1.165273  | 3.596906  | 0.000000  | -3.564430 | 1.157250  | -0.000062 |
| C    | -1.886935 | -3.297791 | 0.000000  | 3.313322  | -1.804817 | 0.000006  |
| C    | 0.368627  | -3.044657 | 1.369949  | 3.043314  | 0.395706  | 1.358545  |
| O    | -2.793869 | -4.007492 | 0.000000  | 4.062513  | -2.700566 | -0.000025 |
| O    | -4.010861 | 0.905521  | 0.000000  | -0.915100 | -3.986980 | -0.000335 |
| O    | -2.306226 | 4.369380  | 0.000000  | -4.435545 | -2.220405 | -0.000395 |
| O    | 0.870580  | -3.628170 | 2.227104  | 3.654822  | 0.888100  | 2.222160  |
| O    | 3.464766  | -2.404972 | 0.000000  | 2.332518  | 3.465133  | 0.000340  |
| O    | 1.976375  | 4.415733  | 0.000000  | -4.403048 | 1.970330  | -0.000032 |
| O    | 3.775348  | 1.852749  | 0.000000  | -1.834591 | 3.796203  | 0.000216  |
| O    | -1.676019 | -1.038057 | 2.522232  | 1.080079  | -1.719972 | 2.522490  |
| O    | -1.676019 | -1.038057 | -2.522232 | 1.080285  | -1.719590 | -2.522643 |
| O    | -0.632075 | 1.982159  | 2.907342  | -1.973636 | -0.716757 | 2.901191  |
| O    | -0.632075 | 1.982159  | -2.907342 | -1.973362 | -0.716282 | -2.901479 |
| O    | 1.488785  | -0.200758 | 2.969699  | 0.182376  | 1.465326  | 2.973576  |
| O    | 1.488785  | -0.200758 | -2.969699 | 0.182618  | 1.465816  | -2.973341 |
| C    | 0.368627  | -3.044657 | -1.369949 | 3.043423  | 0.395910  | -1.358224 |
| O    | 0.870580  | -3.628170 | -2.227104 | 3.654996  | 0.888432  | -2.221722 |

**Table S9.** Cartesian coordinates for the optimized Fe<sub>4</sub>(CO)<sub>14</sub> structure **14-3**

| <b>14-3</b> | B3LYP     |           |           | BP86      |           |           |
|-------------|-----------|-----------|-----------|-----------|-----------|-----------|
|             | X         | Y         | Z         | X         | Y         | Z         |
| Fe          | 0.000000  | 1.343269  | 0.917966  | 0.000000  | 1.325608  | 0.880998  |
| Fe          | -1.380939 | 0.000000  | -0.887128 | -1.400568 | 0.000000  | -0.851510 |
| Fe          | 0.000000  | -1.343269 | 0.917966  | 0.000000  | -1.325608 | 0.880998  |
| Fe          | 1.380939  | 0.000000  | -0.887128 | 1.400568  | 0.000000  | -0.851510 |
| C           | 3.190561  | 0.000000  | -0.932796 | 3.185770  | 0.000000  | -0.944844 |
| C           | 1.362246  | 1.341130  | -2.078292 | 1.370724  | 1.331306  | -2.037218 |
| C           | 1.362246  | -1.341130 | -2.078292 | 1.370724  | -1.331306 | -2.037218 |
| C           | -1.828364 | -1.386688 | 0.920400  | -1.840720 | -1.376027 | 0.887584  |
| C           | -3.190561 | 0.000000  | -0.932796 | -3.185770 | 0.000000  | -0.944844 |
| C           | 1.828364  | -1.386688 | 0.920400  | 1.840720  | -1.376027 | 0.887584  |
| C           | -1.362246 | 1.341130  | -2.078292 | -1.370724 | 1.331306  | -2.037218 |
| C           | -1.362246 | -1.341130 | -2.078292 | -1.370724 | -1.331306 | -2.037218 |
| C           | 1.828364  | 1.386688  | 0.920400  | 1.840720  | 1.376027  | 0.887584  |
| C           | -1.828364 | 1.386688  | 0.920400  | -1.840720 | 1.376027  | 0.887584  |
| C           | 0.000000  | -3.086252 | 0.473285  | 0.000000  | -3.069658 | 0.487182  |
| C           | 0.000000  | 3.086252  | 0.473285  | 0.000000  | 3.069658  | 0.487182  |
| C           | 0.000000  | 1.476388  | 2.702826  | 0.000000  | 1.467137  | 2.659868  |
| O           | -4.335764 | 0.000000  | -1.030897 | -4.344748 | 0.000000  | -1.066335 |
| O           | 4.335764  | 0.000000  | -1.030897 | 4.344748  | 0.000000  | -1.066335 |
| O           | -2.882924 | -1.728046 | 1.293251  | -2.886811 | -1.755936 | 1.289140  |
| O           | 2.882924  | -1.728046 | 1.293251  | 2.886811  | -1.755936 | 1.289140  |
| O           | 1.484118  | -2.200026 | -2.839916 | 1.499134  | -2.191087 | -2.819015 |
| O           | -1.484118 | -2.200026 | -2.839916 | -1.499134 | -2.191087 | -2.819015 |
| O           | 0.000000  | -4.215111 | 0.232450  | 0.000000  | -4.222270 | 0.288516  |
| O           | -1.484118 | 2.200026  | -2.839916 | -1.499134 | 2.191087  | -2.819015 |
| O           | 1.484118  | 2.200026  | -2.839916 | 1.499134  | 2.191087  | -2.819015 |
| O           | 2.882924  | 1.728046  | 1.293251  | 2.886811  | 1.755936  | 1.289140  |
| O           | 0.000000  | 4.215111  | 0.232450  | 0.000000  | 4.222270  | 0.288516  |
| O           | -2.882924 | 1.728046  | 1.293251  | -2.886811 | 1.755936  | 1.289140  |
| O           | 0.000000  | 1.638441  | 3.845904  | 0.000000  | 1.646212  | 3.814530  |
| C           | 0.000000  | -1.476388 | 2.702826  | 0.000000  | -1.467137 | 2.659868  |
| O           | 0.000000  | -1.638441 | 3.845904  | 0.000000  | -1.646212 | 3.814530  |

**Table S10.** Harmonic vibrational frequencies for the optimized Fe<sub>4</sub>(CO)<sub>16</sub> structure **16-1**.

---

**16-1** B3LYP

13(0), 9(0), 43(0), 43(0), 44(0), 54(0), 58(0), 58(0), 65(0), 67(0), 69(0),  
79(0), 79(0), 79(0), 89(0), 90(1), 98(0), 98(0), 104(0), 104(0), 104(0), 108(0),  
109(0), 116(1), 116(1), 119(0), 126(0), 129(0), 131(0), 131(0), 136(0),  
144(5), 144(5), 149(0), 153(0), 155(0), 159(0), 159(0), 378(0), 382(2), 382(2),  
387(0), 399(0), 405(3), 405(33), 405(33), 413(3), 416(1), 416(1), 421(0),  
422(0), 426(9), 426(9), 430(0), 456(1), 474(16), 474(16), 477(0), 477(0), 479(9),  
479(9), 481(0), 509(3), 509(3), 511(0), 516(0), 523(0), 532(0), 532(0),  
539(9), 549(0), 552(73), 552(21), 552(21), 562(0), 595(27), 595(27), 597(132),  
599(0), 608(325), 608(325), 620(0), 621(0), 630(251), 630(251), 641(0), 2026(0),  
2028(0), 2043(3), 2043(3), 2055(15), 2055(15), 2061(18), 2072(4), 2072(4),  
2081(0), 2086(0), 2087(3486), 2092(0), 2115(3836), 2115(3836), 2170(0)

---

BP86

29(0), 29(0), 29(0), 36(0), 41(0), 53(0), 58(0), 58(0), 59(0), 67(0), 74(0),  
77(0), 77(0), 78(0), 86(0), 87(1), 94(0), 94(0), 96(0), 99(0), 99(0), 105(0),  
109(0), 111(1), 111(1), 115(0), 121(0), 129(0), 129(1), 129(1), 131(0), 143(6),  
143(6), 147(0), 155(0), 156(0), 162(0), 162(0), 368(0), 373(1), 373(1),  
380(0), 397(4), 401(0), 402(25), 402(25), 417(1), 417(0), 417(0), 418(0), 426(0),  
433(10), 433(10), 437(0), 459(1), 485(7), 485(7), 486(0), 493(0), 494(1),  
494(1), 498(0), 513(0), 513(7), 513(7), 517(0), 525(0), 530(0), 530(0), 534(0),  
535(0), 539(30), 539(30), 550(0), 562(75), 587(8), 587(8), 588(106), 589(0),  
601(258), 601(258), 618(0), 619(0), 626(200), 626(200), 632(0), 1942(0),  
1960(21), 1960(21), 1962(0), 1977(18), 1979(75), 1979(75), 1991(9), 1991(9),  
2001(2870), 2002(0), 2005(0), 2012(0), 2038(2631), 2038(2631), 2081(0)

---

**Table S11.** Harmonic vibrational frequencies for the optimized Fe<sub>4</sub>(CO)<sub>16</sub> structure **16-2**.

---

**16-2** B3LYP

-17(0), 33(0), 34(0), 34(0), 38(0), 57(0), 57(0), 59(0), 66(0), 73(0), 73(0), 76(0),  
85(0), 90(1), 96(0), 99(0), 99(0), 103(0), 107(0), 107(0), 113(0), 114(0), 116(2),  
116(2), 117(0), 126(0), 126(0), 126(0), 131(0), 132(0), 137(0), 140(0), 140(0),  
141(0), 155(0), 155(0), 159(0), 164(0), 400(0), 400(0), 400(0), 401(0), 404(0),  
404(1), 404(1), 408(0), 410(0), 411(2), 412(2), 412(2), 416(31), 416(31), 418(0),  
425(0), 453(0), 471(31), 471(31), 479(0), 479(2), 481(9), 481(9), 481(0), 521(0),  
522(1), 522(1), 526(0), 529(0), 529(0), 535(34), 535(0), 553(0), 559(0), 559(0),  
563(0), 576(0), 601(9), 601(9), 602(140), 603(0), 606(0), 613(219), 613(219),  
633(365), 633(365), 633(29), 642(0), 2044(0), 2050(43), 2053(21), 2053(21),  
2055(0), 2060(17), 2060(17), 2070(0), 2070(0), 2073(38), 2090(0), 2099(0),  
2105(3280), 2112(3939), 2112(3939), 2174(0)

---

BP86

-18(0), 24(0), 24(0), 25(0), 34(0), 52(0), 52(0), 56(0), 63(0), 66(0), 70(0), 70(0),  
81(0), 87(1), 92(0), 96(0), 96(0), 102(0), 103(0), 103(0), 108(0), 110(0), 111(3),  
111(3), 116(0), 121(0), 121(0), 123(0), 127(0), 129(0), 136(0), 138(0), 138(0),  
139(0), 152(0), 153(0), 153(0), 158(0), 395(0), 395(0), 397(0), 397(0), 401(0),  
401(0), 401(0), 403(0), 405(0), 409(0), 409(0), 413(0), 427(0), 430(21), 430(21),  
437(0), 462(0), 482(15), 482(15), 488(0), 492(0), 493(0), 493(0), 495(0), 524(0),  
526(1), 526(1), 528(0), 534(0), 534(0), 539(15), 539(0), 540(0), 546(0), 546(0),  
549(0), 591(0), 592(134), 592(6), 592(6), 596(0), 601(0), 610(149), 610(149),  
629(307), 629(307), 630(20), 634(0), 1961(0), 1971(27), 1971(27), 1971(0),  
1979(80), 1982(76), 1982(76), 1993(78), 1993(78), 2004(0), 2007(168), 2017(0),  
2020(2500), 2038(2621), 2038(2621), 2086(0)

---

**Table S12.** Harmonic vibrational frequencies for the optimized Fe<sub>4</sub>(CO)<sub>16</sub> structure **16-3**.

---

**16-3** B3LYP

13(0), 32(0), 43(0), 52(0), 55(0), 56(0), 60(0), 63(0), 66(0), 69(0), 81(0), 83(0),  
84(0), 86(1), 90(0), 90(0), 94(2), 97(0), 97(2), 104(0), 106(0), 106(0), 114(0),  
115(0), 118(0), 118(0), 120(0), 125(1), 128(0), 129(0), 136(0), 136(0), 136(0),  
140(0), 149(0), 160(0), 239(12), 241(0), 363(0), 369(72), 380(0), 380(1), 393(0),  
396(0), 403(0), 405(0), 409(0), 412(32), 413(0), 414(10), 423(0), 423(0), 432(0),  
440(3), 447(28), 450(0), 465(38), 467(0), 478(16), 478(0), 486(0), 490(35),  
493(5), 497(0), 503(0), 504(1), 506(0), 518(27), 523(0), 532(59), 557(7), 557(0),  
564(0), 565(0), 597(36), 599(105), 599(0), 610(0), 621(0), 623(0), 625(122),  
627(335), 629(417), 636(0), 661(154), 662(0), 1866(815), 1872(0), 2052(0),  
2055(24), 2061(2), 2062(0), 2069(65), 2073(0), 2085(0), 2096(0), 2098(179),  
2104(3072), 2111(0), 2113(3314), 2128(3459), 2177(0)

---

BP86

9(0), 20(0), 41(0), 43(0), 48(0), 51(0), 56(0), 60(0), 64(0), 68(0), 78(0), 79(0),  
80(0), 81(1), 86(0), 89(0), 92(1), 92(0), 92(1), 100(0), 103(0), 103(0), 109(0),  
111(0), 115(0), 115(0), 116(0), 121(1), 127(0), 129(0), 132(0), 133(0), 136(0),  
137(0), 148(1), 163(0), 238(10), 239(0), 364(0), 376(64), 377(1), 378(0), 389(3),  
389(0), 400(0), 404(0), 413(0), 424(0), 425(0), 429(0), 430(20), 432(4), 434(0),  
438(0), 454(24), 456(0), 469(14), 469(0), 475(0), 490(4), 494(0), 495(15),  
500(33), 507(0), 511(0), 513(18), 514(0), 515(2), 517(0), 521(63), 542(0),  
542(6), 548(0), 549(1), 588(21), 590(0), 596(38), 604(0), 613(0), 613(125),  
618(0), 621(318), 629(361), 631(0), 653(162), 655(0), 1824(691), 1828(0),  
1961(0), 1966(45), 1980(2), 1981(0), 1991(184), 1996(0), 1999(0), 2014(346),  
2017(0), 2022(2761), 2025(2294), 2028(0), 2052(2470), 2090(0)

---

**Table S13.** Harmonic vibrational frequencies for the optimized Fe<sub>4</sub>(CO)<sub>16</sub> structure **16-4**.

---

**16-4** B3LYP

-23(0), -19(0), 32(0), 41(0), 41(0), 41(0), 60(0), 60(0), 61(0), 68(0), 76(0), 76(0),  
80(0), 89(0), 90(1), 102(0), 102(0), 107(0), 109(0), 118(0), 118(3), 118(3),  
122(0), 125(0), 129(0), 129(0), 130(0), 136(0), 136(0), 142(0), 147(0), 147(0),  
150(0), 152(0), 155(0), 157(0), 157(0), 158(0), 402(0), 402(0), 404(0), 405(0),  
405(0), 408(0), 409(2), 409(2), 410(0), 412(0), 413(0), 413(0), 416(34), 416(34),  
416(1), 424(0), 454(0), 473(35), 473(35), 479(0), 481(0), 482(0), 483(11),  
483(11), 529(3), 529(3), 530(0), 531(0), 533(0), 533(0), 536(35), 537(0), 556(0),  
561(0), 561(0), 564(0), 580(0), 605(160), 605(0), 605(0), 606(0), 608(0),  
616(237), 616(237), 633(0), 635(367), 635(367), 642(0), 2038(0), 2043(0),  
2055(0), 2059(0), 2059(0), 2060(33), 2060(33), 2070(0), 2070(0), 2073(0),  
2091(0), 2100(0), 2103(3364), 2114(4020), 2114(4020), 2174(0)

---

BP86

-25(0), -22(0), 23(0), 31(0), 31(0), 40(0), 51(0), 56(0), 56(0), 65(0), 72(0), 72(0),  
77(0), 85(0), 87(1), 99(0), 99(0), 103(0), 108(0), 113(3), 113(3), 116(0), 121(0),  
122(0), 127(0), 127(0), 127(0), 131(0), 131(0), 138(0), 142(0), 142(0), 145(0),  
147(0), 150(0), 154(0), 154(0), 155(0), 397(0), 397(0), 401(0), 401(0), 402(0),  
405(0), 407(1), 407(1), 409(0), 409(0), 409(0), 413(0), 425(0), 430(21), 430(21),  
436(0), 463(0), 483(18), 483(18), 489(0), 491(0), 496(0), 496(0), 499(0), 534(2),  
534(2), 535(0), 535(0), 538(0), 538(0), 540(17), 543(0), 543(0), 548(0), 548(0),  
550(0), 594(143), 596(0), 596(0), 596(0), 600(0), 600(0), 613(156), 613(156),  
631(314), 631(314), 632(0), 634(0), 1955(0), 1971(0), 1972(0), 1976(0), 1976(0),  
1980(21), 1980(21), 1994(126), 1994(126), 2005(0), 2009(0), 2016(2765),  
2018(0), 2039(2671), 2039(2671), 2086(0)

---

**Table S14.** Harmonic vibrational frequencies for the optimized Fe<sub>4</sub>(CO)<sub>15</sub> structure **15-1**.

---

**15-1** B3LYP

20(0), 35(0), 38(0), 39(0), 52(0), 57(0), 60(0), 66(0), 71(0), 75(0), 78(0), 81(0),  
84(0), 87(0), 90(0), 91(1), 94(1), 99(0), 100(0), 106(0), 107(0), 110(0), 112(0),  
118(0), 120(3), 130(1), 135(0), 135(0), 139(0), 141(1), 146(0), 153(0), 158(0),  
161(0), 171(0), 208(11), 315(14), 357(1), 393(1), 398(0), 402(0), 407(1), 409(9),  
411(15), 411(0), 415(0), 417(0), 422(0), 424(1), 430(2), 447(22), 460(0),  
461(13), 464(25), 475(10), 479(9), 485(2), 486(1), 486(22), 494(8), 499(3),  
504(13), 511(21), 520(18), 531(14), 536(20), 556(11), 565(1), 566(0), 589(34),  
603(11), 606(29), 609(22), 612(88), 613(63), 619(40), 621(74), 631(84),  
641(117), 643(313), 653(61), 1940(431), 2038(240), 2045(0), 2050(6), 2060(77),  
2062(136), 2069(155), 2071(343), 2072(14), 2074(507), 2096(19), 2102(2798),  
2105(3364), 2117(2917), 2172(31)

---

BP86

-22(0), 17(0), 26(1), 41(4), 46(0), 53(1), 54(0), 59(0), 62(1), 70(0), 75(1), 79(0),  
82(1), 83(1), 85(0), 88(0), 91(1), 94(0), 96(0), 102(0), 106(1), 107(0), 113(1),  
117(0), 125(1), 127(1), 130(0), 132(0), 140(0), 152(5), 156(0), 157(1), 162(0),  
167(2), 184(0), 237(13), 305(26), 345(34), 389(0), 395(0), 404(0), 406(15),  
408(0), 416(0), 421(0), 422(4), 426(6), 428(0), 432(4), 434(1), 436(8), 443(11),  
460(1), 462(0), 463(12), 475(0), 481(1), 495(9), 497(6), 500(3), 506(10), 516(9),  
526(16), 528(4), 533(0), 538(34), 541(8), 542(0), 548(0), 591(2), 593(35),  
594(2), 594(8), 601(49), 609(94), 611(40), 618(22), 632(27), 636(237), 639(135),  
647(99), 1854(443), 1897(395), 1956(2), 1964(13), 1981(90), 1983(6),  
1985(134), 1992(265), 1995(33), 2003(16), 2014(2817), 2019(267), 2024(1938),  
2041(2268), 2085(39)

---

**Table S15.** Harmonic vibrational frequencies for the optimized Fe<sub>4</sub>(CO)<sub>15</sub> structure **15-2**.

---

**15-2** B3LYP

-33(4), 16(0), 38(0), 40(0), 45(0), 50(0), 53(0), 64(0), 69(0), 77(0), 77(0), 78(0),  
82(0), 86(1), 90(0), 93(1), 94(0), 95(0), 95(0), 102(0), 106(0), 112(0), 114(0),  
115(0), 116(6), 123(2), 129(0), 134(0), 138(0), 142(0), 145(0), 146(0), 153(0),  
156(0), 161(1), 195(1), 350(24), 365(0), 372(18), 398(0), 399(0), 409(4),  
412(15), 412(7), 413(0), 414(0), 416(0), 420(0), 426(0), 428(25), 431(2),  
465(15), 473(0), 477(45), 478(28), 478(0), 487(7), 490(7), 502(0), 504(13),  
505(3), 507(0), 509(42), 509(0), 513(3), 538(18), 568(0), 574(7), 575(0),  
580(99), 602(30), 603(0), 608(5), 611(75), 614(56), 616(80), 626(88), 629(95),  
642(352), 642(140), 651(14), 2041(57), 2042(20), 2048(41), 2049(0), 2055(13),  
2057(107), 2059(15), 2072(21), 2074(0), 2082(330), 2095(830), 2098(2651),  
2105(3323), 2111(3549), 2173(0)

---

BP86

27(0), 28(3), 39(0), 40(1), 45(0), 48(0), 53(0), 53(0), 60(2), 73(0), 76(0), 78(0),  
80(0), 84(0), 87(0), 91(0), 91(0), 94(1), 103(0), 104(0), 105(0), 107(0), 112(1),  
114(0), 119(0), 119(0), 133(0), 135(0), 136(0), 143(0), 149(0), 156(0), 160(0),  
175(18), 182(0), 184(10), 316(10), 329(9), 344(1), 400(0), 403(0), 411(0),  
415(0), 417(0), 424(2), 426(0), 431(0), 433(8), 433(0), 438(1), 451(1), 457(14),  
458(0), 479(5), 479(10), 491(6), 495(27), 499(0), 499(1), 500(0), 515(1),  
517(22), 518(11), 520(2), 527(0), 534(11), 546(18), 548(0), 556(0), 586(23),  
590(0), 599(0), 603(6), 604(79), 609(87), 609(51), 613(47), 624(79), 639(116),  
651(217), 656(17), 1876(124), 1877(465), 1964(13), 1967(17), 1967(79),  
1976(235), 1984(0), 1989(120), 1991(686), 2006(167), 2015(23), 2016(2812),  
2034(1490), 2036(2321), 2085(1)

---



**Table S16.** Harmonic vibrational frequencies for the optimized Fe<sub>4</sub>(CO)<sub>14</sub> structure **14-1**.

---

**14-1** B3LYP

-34(0), 13(0), 28(0), 28(0), 45(1), 58(0), 67(0), 71(0), 75(0), 80(0), 86(0), 86(0),  
90(0), 92(0), 101(0), 103(0), 104(0), 106(0), 115(1), 119(0), 120(0), 122(0),  
123(0), 125(1), 127(0), 128(0), 134(0), 146(0), 154(4), 162(6), 182(1), 193(2),  
201(1), 220(0), 326(3), 342(1), 375(4), 384(1), 386(0), 393(6), 399(1), 409(2),  
416(0), 421(7), 425(5), 426(1), 428(1), 445(17), 446(1), 451(17), 469(11),  
470(12), 484(19), 487(21), 491(0), 492(18), 495(5), 500(0), 511(3), 523(18),  
527(17), 532(3), 534(16), 560(0), 561(21), 565(157), 568(185), 585(12), 589(96),  
590(1), 608(17), 613(3), 619(186), 622(246), 630(173), 641(29), 1965(247),  
1976(930), 2000(167), 2021(278), 2024(55), 2037(72), 2078(3), 2087(77),  
2089(305), 2090(192), 2104(2838), 2108(2996), 2108(2972), 2163(0)

---

BP86

10(0), 16(0), 16(0), 43(0), 43(0), 56(0), 62(0), 67(0), 67(0), 76(0), 85(0), 85(0),  
86(0), 90(0), 100(0), 100(0), 102(0), 106(0), 113(0), 119(0), 119(1), 120(0),  
120(0), 121(0), 125(0), 125(0), 138(0), 142(0), 173(2), 173(2), 198(9), 198(9),  
202(1), 228(0), 331(9), 331(9), 377(0), 377(0), 383(7), 384(0), 393(0), 393(0),  
405(0), 416(3), 417(11), 417(11), 426(0), 439(36), 439(36), 444(0), 476(0),  
476(0), 496(0), 501(2), 501(2), 505(0), 506(0), 507(0), 523(2), 523(2), 526(0),  
531(0), 541(5), 550(87), 550(87), 555(70), 555(70), 579(0), 584(0), 589(65),  
604(3), 604(3), 615(215), 615(215), 618(153), 633(0), 1888(0), 1892(792),  
1947(94), 1947(94), 1950(0), 1950(155), 1991(0), 2000(0), 2003(467),  
2003(467), 2026(1917), 2028(2119), 2028(2119), 2071(0)

---

**Table S17.** Harmonic vibrational frequencies for the optimized Fe<sub>4</sub>(CO)<sub>14</sub> structure **14-2**

---

**14-2** B3LYP

23(0), 42(0), 42(0), 48(0), 55(0), 56(0), 67(0), 68(0), 77(0), 79(0), 80(0), 84(0),  
85(0), 86(0), 88(0), 94(0), 98(0), 100(1), 102(0), 103(0), 108(0), 109(0), 111(1),  
113(0), 117(1), 128(3), 140(0), 144(1), 148(0), 152(0), 187(1), 201(0), 236(2),  
281(1), 299(1), 385(0), 391(0), 402(25), 402(0), 404(0), 409(1), 410(0), 415(12),  
419(1), 425(33), 431(5), 435(0), 455(12), 457(4), 466(3), 466(28), 471(6),  
474(2), 479(5), 481(10), 504(6), 510(8), 513(6), 518(0), 520(2), 525(10),  
531(22), 536(12), 547(4), 560(2), 565(2), 581(23), 593(151), 605(39), 606(209),  
615(70), 615(45), 621(34), 624(272), 637(166), 676(169), 1894(518), 1925(142),  
2047(271), 2056(155), 2063(11), 2067(236), 2076(37), 2080(373), 2091(115),  
2098(624), 2102(1976), 2108(2273), 2121(3550), 2168(54)

---

BP86

17(0), 38(0), 38(0), 45(0), 50(0), 50(0), 63(0), 65(0), 70(0), 76(0), 76(0), 81(0),  
82(1), 83(0), 85(0), 91(0), 93(0), 97(0), 101(0), 102(0), 103(0), 106(0), 107(0),  
109(0), 115(1), 127(3), 138(0), 142(1), 144(0), 152(0), 189(1), 212(0), 234(0),  
278(2), 306(1), 371(0), 382(0), 396(0), 399(0), 401(16), 405(0), 409(7), 414(0),  
427(23), 431(10), 432(0), 437(6), 452(0), 454(13), 473(4), 474(6), 481(1),  
482(7), 491(2), 496(2), 498(2), 506(0), 510(3), 517(2), 521(3), 527(5), 537(1),  
543(16), 547(3), 556(1), 559(10), 573(70), 586(72), 596(43), 606(141), 609(54),  
611(37), 617(0), 623(227), 627(170), 660(127), 1841(340), 1857(89), 1967(195),  
1976(273), 1983(58), 1987(14), 1995(132), 1995(235), 2006(96), 2013(741),  
2014(1830), 2032(1293), 2041(2584), 2079(79)

---

**Table S18.** Harmonic vibrational frequencies for the optimized Fe<sub>4</sub>(CO)<sub>14</sub> structure **14-3**

**14-3** B3LYP

-29(0), 25(0), 34(1), 54(0), 55(0), 58(0), 60(0), 71(0), 73(0), 74(0), 84(0), 85(1),  
86(1), 93(0), 98(0), 103(0), 103(0), 105(1), 106(0), 107(0), 109(1), 110(0),  
115(0), 118(4), 135(0), 156(0), 159(0), 163(0), 165(0), 170(1), 190(0), 192(0),  
198(2), 207(0), 370(2), 376(0), 378(4), 397(4), 399(9), 407(0), 409(0), 413(0),  
416(16), 428(1), 429(0), 431(2), 437(0), 439(0), 460(2), 465(9), 480(5), 482(27),  
485(40), 487(15), 488(18), 495(0), 505(2), 511(0), 520(17), 528(13), 531(0),  
548(0), 552(6), 561(17), 575(41), 582(0), 583(108), 585(64), 601(0), 601(116),  
607(33), 610(65), 618(97), 619(143), 642(215), 662(141), 1944(0), 1970(1348),  
1971(261), 1996(155), 2058(0), 2063(0), 2064(184), 2078(136), 2079(28),  
2105(3197), 2106(921), 2115(1805), 2122(2585), 2167(46)

BP86

-31(0), 27(0), 28(0), 48(0), 55(0), 58(0), 60(0), 68(0), 69(0), 76(0), 79(0), 85(0),  
87(0), 89(0), 94(0), 97(0), 99(0), 101(0), 102(0), 104(0), 105(0), 113(0), 126(3),  
138(2), 140(0), 150(0), 152(0), 162(0), 170(1), 174(0), 191(0), 193(1), 200(4),  
220(2), 362(0), 371(0), 376(1), 387(1), 391(9), 402(1), 402(0), 409(0), 416(20),  
427(1), 429(0), 436(2), 436(0), 440(3), 457(0), 479(11), 486(0), 490(5), 494(6),  
507(1), 507(7), 508(0), 511(0), 518(0), 519(1), 522(28), 531(2), 534(0), 543(2),  
549(29), 572(6), 575(66), 578(0), 578(81), 589(157), 590(4), 593(0), 604(4),  
610(145), 611(165), 627(147), 647(107), 1876(0), 1896(998), 1901(144),  
1920(135), 1974(0), 1981(45), 1988(3), 1995(43), 2000(31), 2016(318),  
2023(2503), 2034(1840), 2039(2017), 2077(48)

**Complete Gaussian 03 reference (Reference 27)**

Frisch, M. J.; Trucks, G. W.; Schlegel, H. B.; Scuseria, G. E.; Robb, M. A.; Cheeseman, J. R.; Montgomery, Jr., J. A.; Vreven, T.; Kudin, K. N.; Burant, J. C.; Millam, J. M.; Iyengar, S. S.; Tomasi, J.; Barone, V.; Mennucci, B.; Cossi, M.; Scalmani, G.; Rega, N.; Petersson, G. A.; Nakatsuji, H.; Hada, M.; Ehara, M.; Toyota, K.; Fukuda, R.; Hasegawa, J.; Ishida, M.; Nakajima, T.; Honda, Y.; Kitao, O.; Nakai, H.; Klene, M.; Li, X.; Knox, J. E.; Hratchian, H. P.; Cross, J. B.; Bakken, V.; Adamo, C.; Jaramillo, J.; Gomperts, R.; Stratmann, R. E.; Yazyev, O.; Austin, A. J.; Cammi, R.; Pomelli, C.; Ochterski, J. W.; Ayala, P. Y.; Morokuma, K.; Voth, G. A.; Salvador, P.; Dannenberg, J. J.; Zakrzewski, V. G.; Dapprich, S.; Daniels, A. D.; Strain, M. C.; Farkas, O.; Malick, D. K.; Rabuck, A. D.; Raghavachari, K.; Foresman, J. B.; Ortiz, J. V.; Cui, Q.; Baboul, A. G.; Clifford, S.; Cioslowski, J.; Stefanov, B. B.; Liu, G.; Liashenko, A.; Piskorz, P.; Komaromi, I.; Martin, R. L.; Fox, D. J.; Keith, T.; Al-Laham, M. A.; Peng, C. Y.; Nanayakkara, A.; Challacombe, M.; Gill, P. M. W.; Johnson, B.; Chen, W.; Wong, M. W.; Gonzalez, C.; and Pople, J. A. Gaussian 03, Revision C.02; Gaussian, Inc., Wallingford CT, **2004**.
